# Supplementary material for: Photoluminescence Spectra Correlations with Structural Distortion in Eu3+- and Ce3+-Doped Y3Al5-2x(Mg,Ge)xO12 (x = 0, 1, 2) Garnet Phosphors
Source: MDPI journal article supplement (doi:10.3390/ma17102445), 2024-05-19

## Supporting Information

### Photoluminescence spectra correlations with structural distortion in $\text{Eu}^{3+}$ - and $\text{Ce}^{3+}$ -doped $\text{Y}_3\text{Al}_{5-2x}(\text{Mg,Ge})_x\text{O}_{12}$ ( $x = 0, 1, 2$ ) garnet phosphors

Heonji Ha<sup>1</sup>, Sungjun Yang<sup>2</sup>, and Sangmoon Park<sup>1,3,\*</sup>

<sup>1</sup>Department of Engineering in Energy Materials, Graduate School, Silla University, Busan 46958, Republic of Korea

<sup>2</sup>UNIST Central Research Facilities, Ulsan National Institute of Science and Technology, Ulsan 44919, Republic of Korea

<sup>3</sup>Department of Environmental Energy & Chemistry, College of Engineering and Department of Fire Protection and Safety Management, College of Health and Welfare, Silla University, Busan 46958, Republic of Korea

**\*Corresponding author:**

E-mail: spark@silla.ac.kr

Figure S1. The X-ray diffraction patterns and excitation and emission spectra of  $\text{Eu}^{3+}$ - and  $\text{Ce}^{3+}$ -doped  $\text{Y}_3\text{Al}_{5-2x}(\text{Mg,Ge})_x\text{O}_{12}$  ((A)  $x = 0$ , (B)  $x = 1$ , (C)  $x = 2$ ) phosphors.

(A)

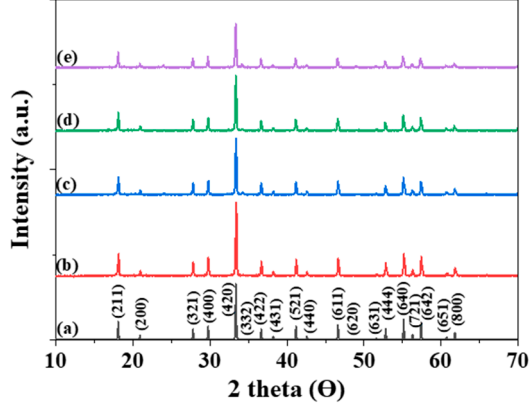

The calculated XRD patterns of  $\text{Y}_3\text{Al}_5\text{O}_{12}$  (a) and obtained XRD patterns of  $\text{Y}_{3-p}\text{Eu}_p\text{Al}_5\text{O}_{12}$  phosphors: (b)  $p = 0.1$ , (c)  $p = 0.3$ , (d)  $p = 0.5$ , and (e)  $p = 0.7$ .

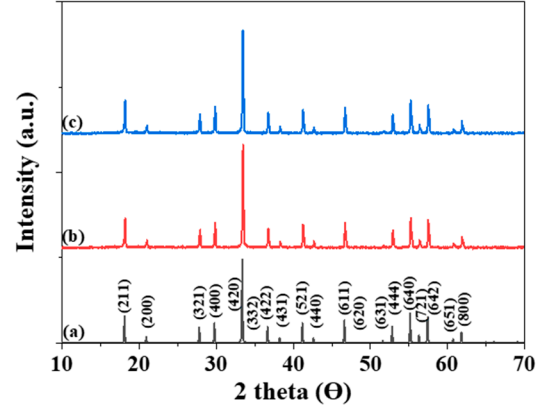

The calculated XRD patterns of  $\text{Y}_3\text{Al}_5\text{O}_{12}$  (a) and obtained XRD patterns of  $\text{Y}_{3-q}\text{Ce}_q\text{Al}_5\text{O}_{12}$  phosphors: (b)  $q = 0.01$  and (c)  $q = 0.05$ .

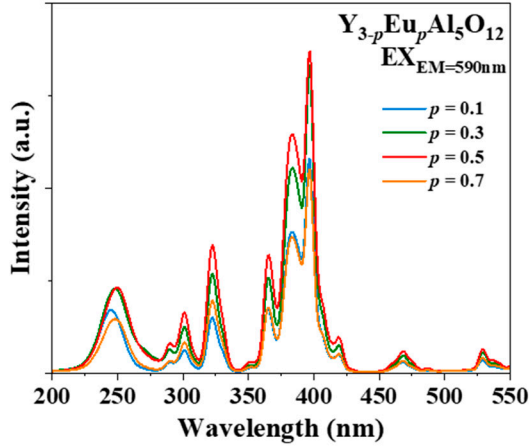

The excitation and emission spectra of  $\text{Y}_{3-p}\text{Eu}_p\text{Al}_5\text{O}_{12}$  ( $p = 0.1-0.7$ ).

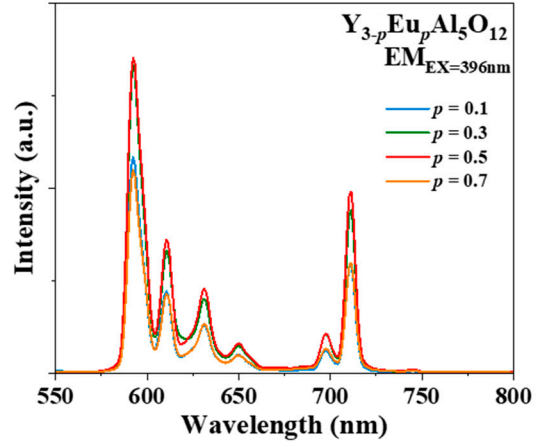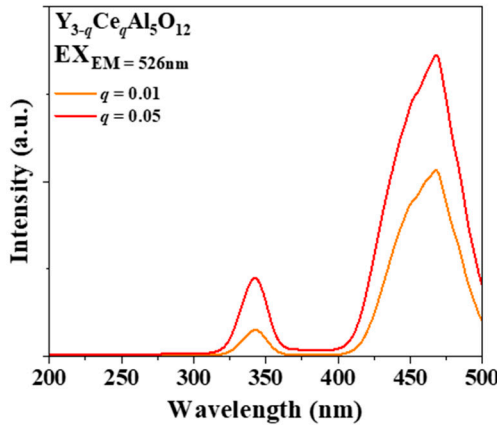

The excitation and emission spectra of  $\text{Y}_{3-q}\text{Ce}_q\text{Al}_5\text{O}_{12}$  ( $q = 0.001-0.05$ ).

(B)

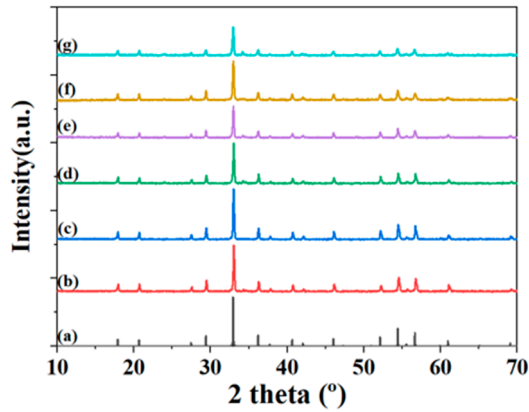

The calculated XRD patterns of  $Y_3MgAl_3GeO_{12}$  (a) and obtained XRD patterns of  $Y_{3-p}Eu_pMgAl_3GeO_{12}$  phosphors (b):  $p = 0.01$ , (c)  $p = 0.1$ , (d)  $p = 0.3$ , (e)  $p = 0.5$ , (f)  $p = 0.7$ , and (d)  $p = 0.8$ .

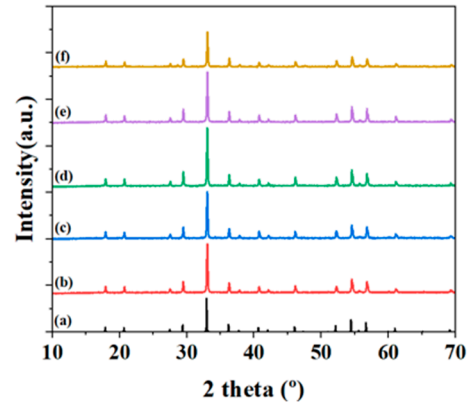

The calculated XRD patterns of  $Y_3MgAl_3GeO_{12}$  (a) and obtained XRD patterns of  $Y_{3-q}Ce_qMgAl_3GeO_{12}$  phosphors (b):  $q = 0.001$ , (c)  $q = 0.005$ , (d)  $q = 0.01$ , (e)  $q = 0.03$ , and (f)  $q = 0.05$ .

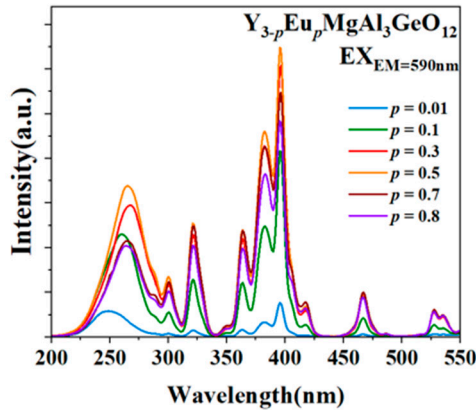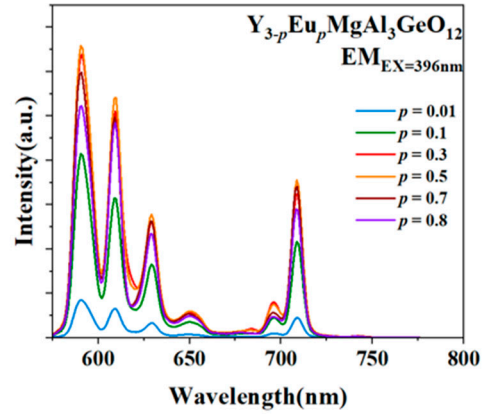

The excitation and emission spectra of  $Y_{3-p}Eu_pMgAl_3GeO_{12}$  (p = 0.01-0.8).

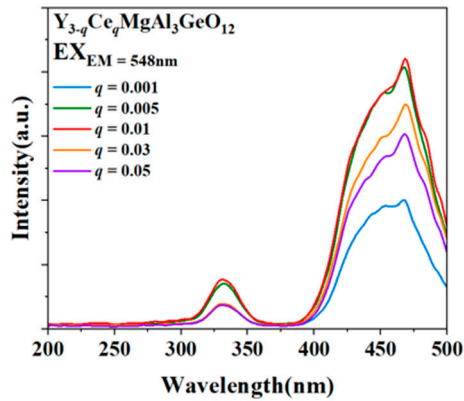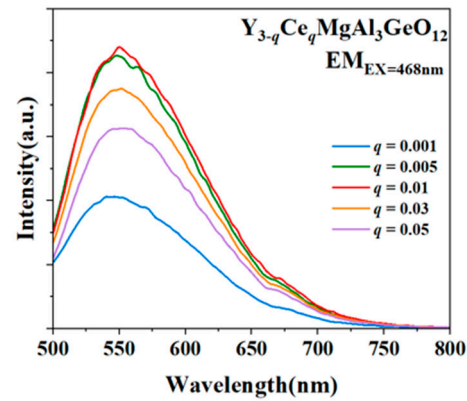

The excitation and emission spectra of  $Y_{3-q}Ce_qMgAl_3GeO_{12}$  (q = 0.001-0.05).

(C)

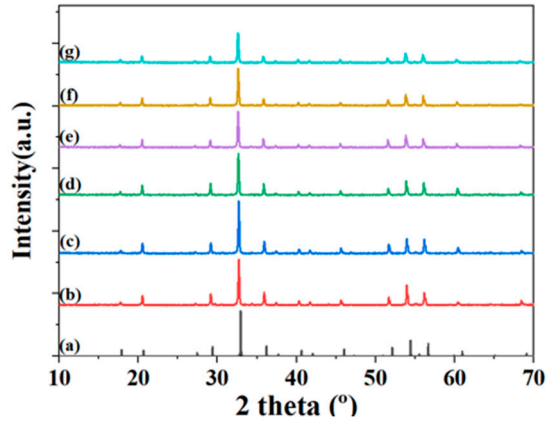

The calculated XRD patterns of  $Y_3Mg_2AlGe_2O_{12}$  (a) and obtained XRD patterns of  $Y_{3-p}Eu_pMg_2AlGe_2O_{12}$  phosphors (b):  $p = 0.01$ , (c)  $p = 0.1$ , (d)  $p = 0.3$ , (e)  $p = 0.5$ , (f)  $p = 0.6$ , and (g)  $p = 0.8$ .

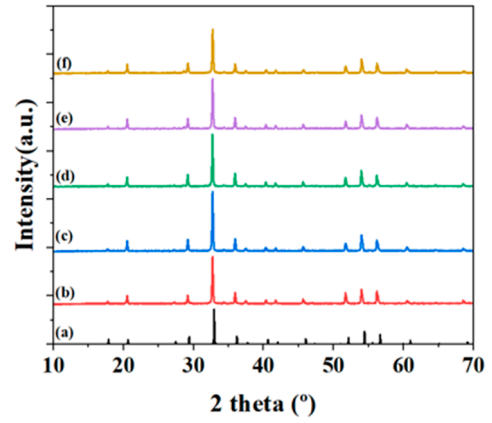

The calculated XRD patterns of  $Y_3Mg_2AlGe_2O_{12}$  (a) and obtained XRD patterns of  $Y_{3-q}Ce_qMg_2AlGe_2O_{12}$  phosphors (b):  $q = 0.001$ , (c)  $q = 0.005$ , (d)  $q = 0.01$ , (e)  $q = 0.025$ , and (f)  $q = 0.05$ .

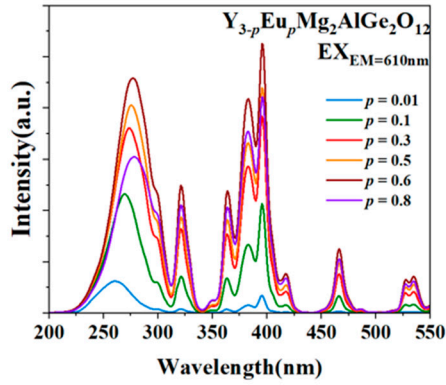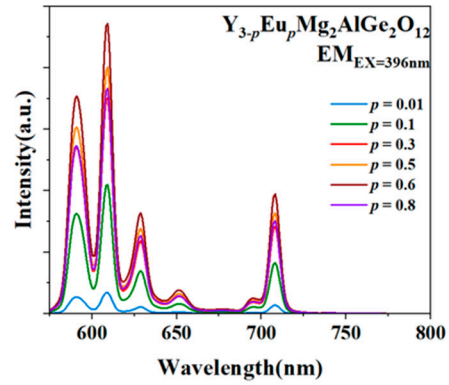

The excitation and emission spectra of  $Y_{3-p}Eu_pMg_2AlGe_2O_{12}$  ( $p = 0.01-0.8$ ).

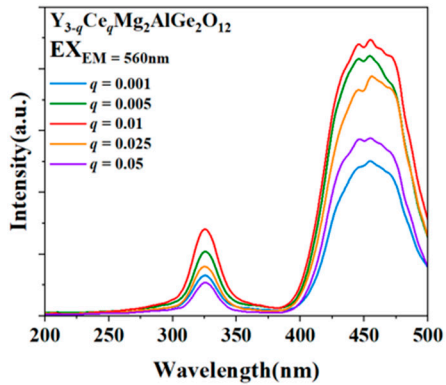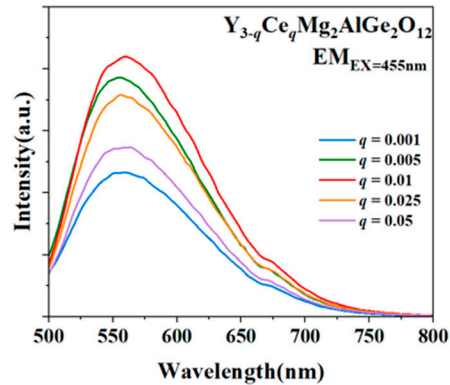

The excitation and emission spectra of  $Y_{3-q}Ce_qMg_2AlGe_2O_{12}$  ( $q = 0.001-0.05$ ).

Figure S2. The excitation and emission spectra of (A)  $Y_{2.5}Eu_{0.5}Mg_xAl_{5-2x}Ge_xO_{12}$  and (B)  $Y_{2.95}Ce_{0.05}Mg_xAl_{5-2x}Ge_xO_{12}$  ( $x = 0-2$ ).

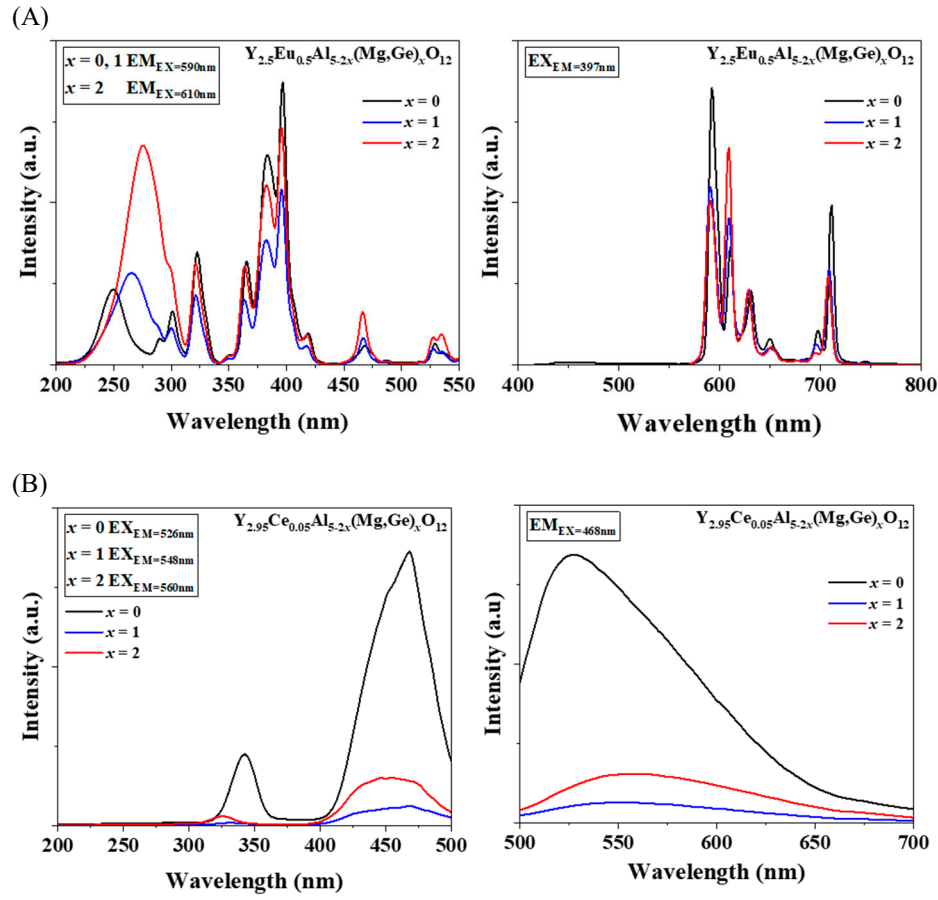

Supplement: s1 [file s1]
